# Supplementary material for: Dietary Macronutrient Composition Differentially Modulates the Remodeling of Mitochondrial Oxidative Metabolism during NAFLD
Source: MDPI journal article supplement (doi:10.3390/metabo11050272), 2021-04-26
Supplement: s1 [file s1]

**Table S1.** Composition of the rodent diets.

|                                       | Low Fat (LF) |             | High Fat (HF) |             | High Fructose/ High Fat (HFr/HF) |             |
|---------------------------------------|--------------|-------------|---------------|-------------|----------------------------------|-------------|
|                                       | g%           | kcal%       | g%            | kcal%       | g%                               | kcal%       |
| Protein                               | 19           | 20          | 26            | 20          | 21                               | 20          |
| Carbohydrate                          | 67           | 70          | 26            | 20          | 57                               | 55          |
| Fat                                   | 4            | 10          | 35            | 60          | 12                               | 25          |
| Total                                 |              | 100         |               | 100         |                                  | 100         |
| <i>kcal/g</i>                         | 3.8          |             | 5.2           |             | 4.2                              |             |
| <b>Ingredient</b>                     | <b>g</b>     | <b>kcal</b> | <b>g</b>      | <b>kcal</b> | <b>g</b>                         | <b>kcal</b> |
| Casein                                | 200          | 800         | 200           | 800         | 200                              | 800         |
| L-Cystine                             | 3            | 12          | 3             | 12          | 3                                | 12          |
| Corn Starch                           | 506          | 2025        | 0             | 0           | 0                                | 0           |
| Maltodextrin 10                       | 125          | 500         | 125           | 500         | 125                              | 500         |
| Sucrose                               | 68.8         | 275         | 68.8          | 275         | 68.8                             | 275         |
| Fructose                              | 0            | 0           | 0             | 0           | 353.8                            | 1415        |
| Cellulose, BW200                      | 50           | 0           | 50            | 0           | 50                               | 0           |
| Soybean Oil                           | 25           | 225         | 25            | 225         | 25                               | 225         |
| Lard                                  | 20           | 180         | 245           | 2205        | 87.7                             | 789         |
| Mineral Mix, S10026                   | 10           | 0           | 10            | 0           | 10                               | 0           |
| DiCalcium Phosphate                   | 13           | 0           | 13            | 0           | 13                               | 0           |
| Calcium Carbonate                     | 5.5          | 0           | 5.5           | 0           | 5.5                              | 0           |
| Potassium Citrate, 1 H <sub>2</sub> O | 16.5         | 0           | 16.5          | 0           | 16.5                             | 0           |
| Vitamin Mix, V10001                   | 10           | 40          | 10            | 40          | 10                               | 40          |
| Choline Bitartrate                    | 2            | 0           | 2             | 0           | 2                                | 0           |
| Total                                 | 1055.0       | 4057        | 773.8         | 4057        | 970.3                            | 4057        |

**Table S2.** Primer sequences used for qPCR measurements.

| <b>Gene</b>   | <b>Forward</b>           | <b>Reverse</b>            |
|---------------|--------------------------|---------------------------|
| <i>Acc1</i>   | GGACAGACTGATCGCAGAGAAAG  | TGGAGAGCCCCACACACA        |
| <i>Fasn</i>   | GCTGCGGAAACTTCAGGAAAT    | AGAGACGTGTCACTCCTGGACTT   |
| <i>Scd1</i>   | GCGATACACTCTGGTGCTCA     | CCCAGGGAAACCAGGATATT      |
| <i>Elovl6</i> | TGCCATGTTTCATCACCTTGT    | TGCTGCATCCAGTTGAAGAC      |
| <i>Cpt1a</i>  | CAAAGATCAATCGGACCCTAGAC  | CGCCACTCACGATGTTCTTC      |
| <i>Lcad</i>   | TCAATGGAAGCAAGGTGTTCA    | GCCACGACGATCACGAGAT       |
| <i>Hmgcs2</i> | GACTTCCTGTCATCCAGC       | GGTGTAGGTTTCTTCCAGC       |
| <i>Tnfa</i>   | CTGAGGTCAATCTGCCCCAAGTAC | CTTCACAGAGCAATGACTCCAAAG  |
| <i>Il6</i>    | TCGTGGAAATGAGAAAAGAGTTG  | AGTGCATCATCGTTGTTCATACA   |
| <i>Nfkbia</i> | GAGCAAATGGTGAAGGAG       | TCTGGAAGTTGAGGAAGG        |
| <i>Pgc1a</i>  | AGACAAATGTGCTTCCAAAAAGAA | GAAGAGATAAAGTTGTTGGTTTGGC |
| <i>Ppib</i>   | GGAGATGGCACAGGAGGAA      | GCCCGTAGTGCTTCAGCTT       |

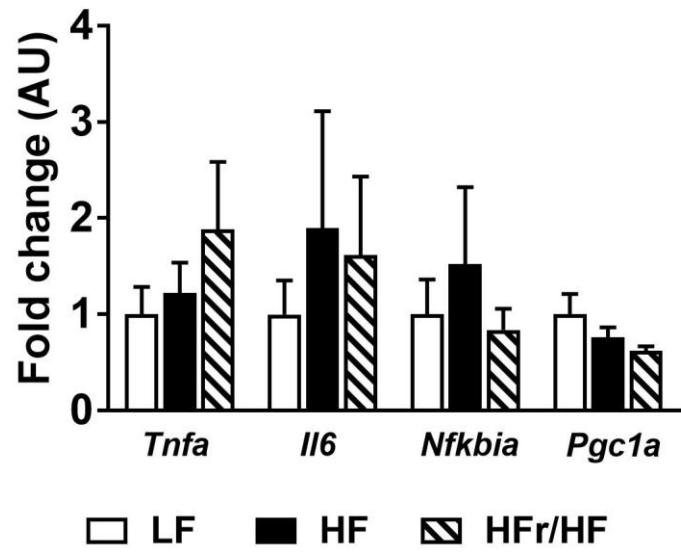

**Figure S1.** Gene expression profiles of canonical markers of inflammation and *Pgc1a* in livers isolated from mice under 'Fed' state. Results ( $n = 5/\text{group}$ ) were considered significant at  $p \leq 0.05$ .
